# Supplementary material for: Caveats of Using Overexpression Approaches to Screen Cellular Host IFITM Proteins for Antiviral Activity
Source: MDPI journal article supplement (doi:10.3390/pathogens12040519), 2023-03-27
Supplement: s1 [file s1]

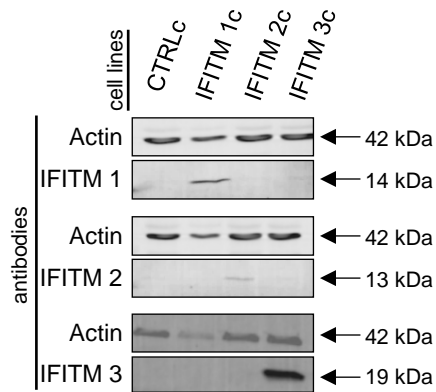

**Supplementary Figure 1:** Constitutive overexpression of IFITM1, IFITM2 and IFITM3 in A549 cells detected with IFITM specific antibodies.

Lysates from A549 IFITM1c, IFITM2c, IFITM3c or CTRLc cells were prepared, resolved by SDS-PAGE under reducing conditions and transferred to a polyvinylidene fluoride (PVDF) membrane. Proteins were detected by western blot, using IFITM-specific antibodies in conjunction with anti-mouse AlexaFluor-488 (IFITM1c and IFITM2c) or anti-rabbit AlexaFluor-568 (IFITM3c). Beta-actin (42kDa) expression was monitored to ensure equivalent loading between samples.
